# Supplementary material for: Cryo-EM structure and polymorphism of Aβ amyloid fibrils purified from Alzheimer’s brain tissue
Source: PubMed Central journal article supplement (PMC6820800; doi:10.1038/s41467-019-12683-8), 2019-10-29
Supplement: 41467_2019_12683_MOESM1_ESM.pdf [file 41467_2019_12683_MOESM1_ESM.pdf]

## **Supplementary Information**

### **Cryo-EM structure and polymorphism of A $\beta$ amyloid fibrils purified from Alzheimer's brain tissue**

Marius Kollmer *et al.*

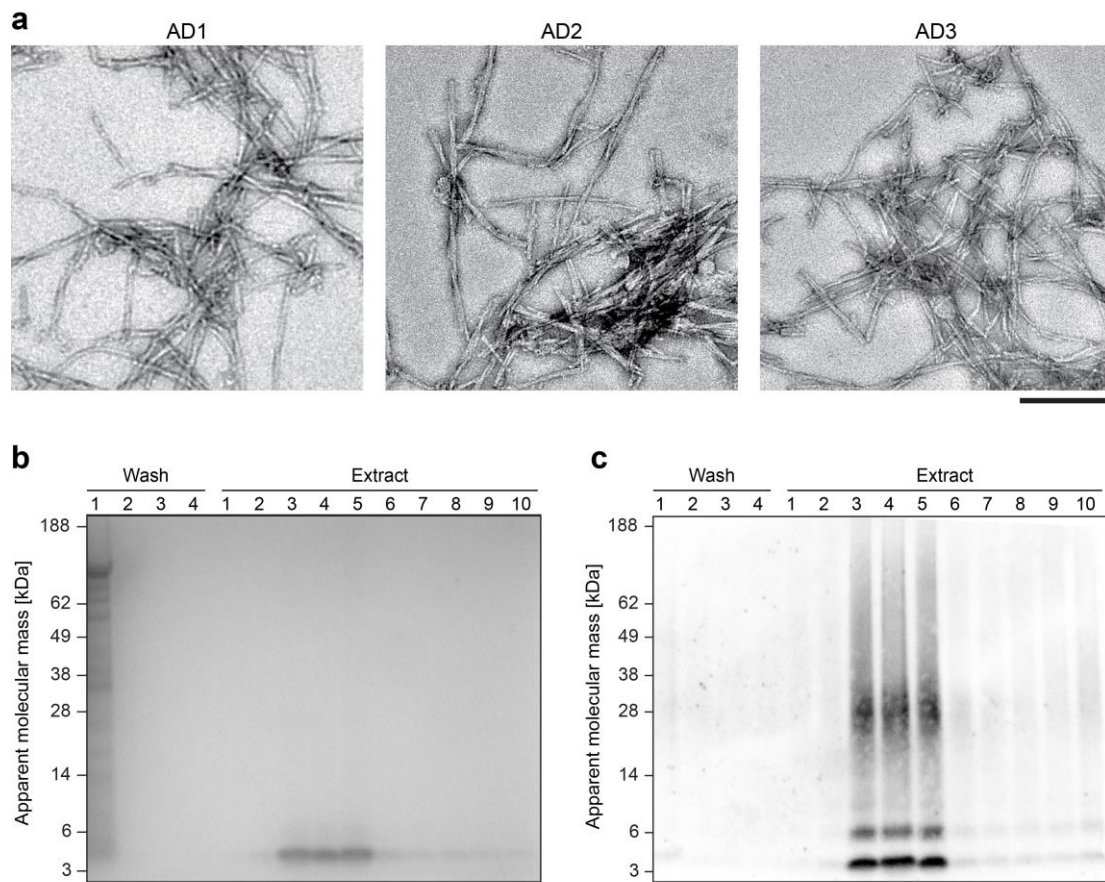

**Supplementary Figure 1.**

**Purification of A $\beta$  amyloid fibrils from AD1, AD2 and AD3.**

(a) Negative stain TEM image of the A $\beta$  amyloid fibrils extracted from patients AD1, AD2 and AD3. Scale bar: 200 nm. (b-c) Representative Coomassie-stained denaturing protein gel (b) and western blot (c) of four washing steps with Tris-EDTA buffer and the first ten fibril extraction steps using water. The western blot uses 6E10 primary antibody, which recognizes the A $\beta$  N-terminus.

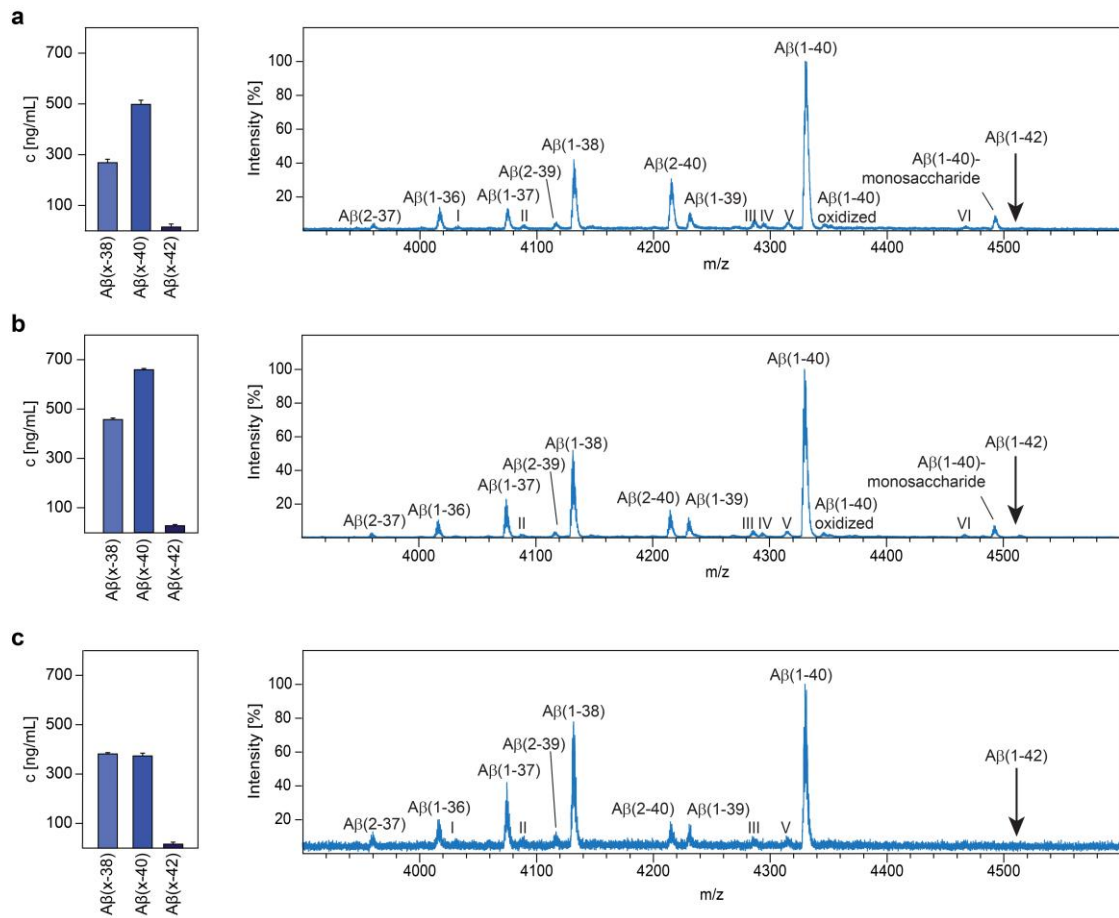

**Supplementary Figure 2.**

**Molecular composition of brain-derived Aβ amyloid fibrils.**

(a-c) Constitutional analysis of the fibril extracts from AD1 (a), AD2 (b) and AD3 (c). Left side: the MSD 96-well MULTI-SPOT Human (6E10) Aβ Triplex Assay determines the relative concentrations of Aβ(x-38), Aβ(x-40) and Aβ(x-42) in the fibril extracts. Error bars show standard deviation. Right side: mass spectra of the fibril extracts (see Supplementary Table 1 for details). The expected position of Aβ(1-42) is marked. Roman numbers (I-VI) refer to peaks that could not be assigned ( $\pm 2$  Da mass difference) to any fragment of Aβ(1-43) considering the following possible modifications: pyroglutamylation, nitration, phosphorylation, oxidation and glycosylation.

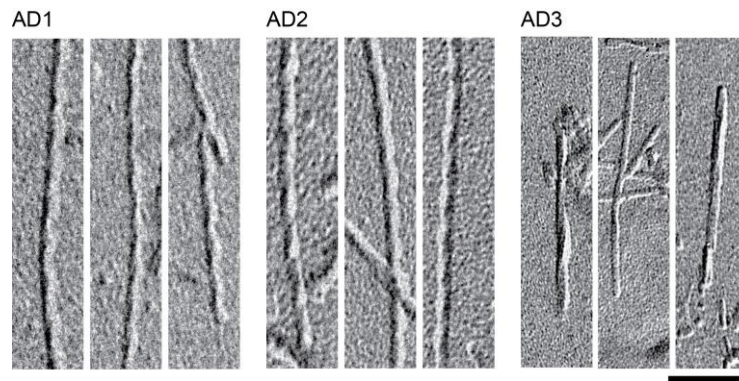

**Supplementary Figure 3.**

**Right hand supertwist of brain-derived A $\beta$  amyloid fibrils from cases AD1-AD3.**

TEM images of platinum side shadowed A $\beta$  amyloid fibrils extracted from patients AD1-AD3 as indicated in the figure. Scale bar: 50 nm.

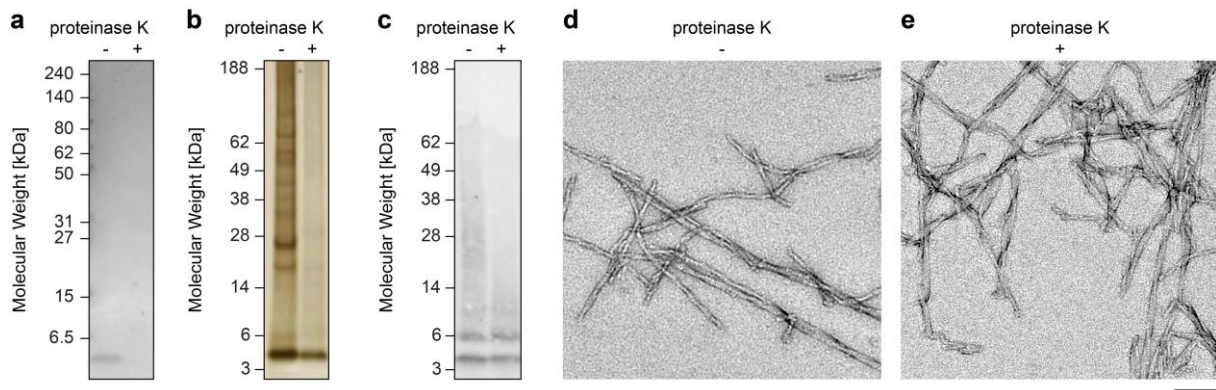

#### Supplementary Figure 4.

##### **Brain-derived A $\beta$ amyloid fibrils are more proteinase K stable than *in vitro* formed A $\beta$ fibrils.**

(a) Coomassie-stained denaturing protein gel of a sample of 120  $\mu\text{g/mL}$  *in vitro* formed A $\beta$  fibrils before and after digestion with 50  $\mu\text{g/mL}$  proteinase K. (b) Silver-stained denaturing protein gel of 20  $\mu\text{g/mL}$  purified AD1 A $\beta$  amyloid fibrils before and after digestion with 50  $\mu\text{g/mL}$  proteinase K. (c) Western blot with 6E10 primary antibody of the same two samples as in panel (b). (d-e) Negative stain TEM images of brain-derived A $\beta$  amyloid fibrils before (d) and after (e) proteinase K digestion. Scale bar: 200 nm.

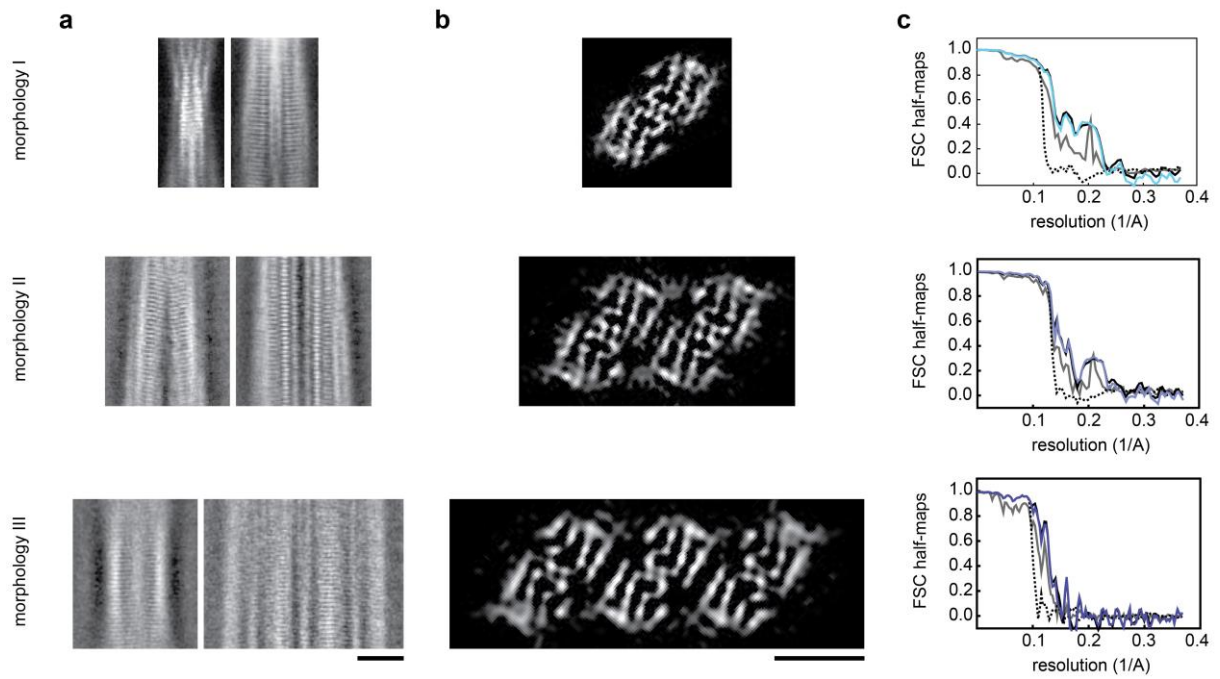

### Supplementary Figure 5.

#### 2D class averages and resolution estimates for the 3D density maps of fibril morphologies I-III.

(a) Representative 2D class averages of fibril morphologies I, II and III, taken at different axial positions. The class averages show a staggering of  $\beta$ -strands along the fibril axis and suggest the presence of a pseudo  $2_1$ -screw axis. Scale bar: 5 nm. (b) Cross-sectional density of fibril morphologies I-III. Scale bar: 5 nm (c) FSC between the two half-maps (blue lines = FSC corrected; grey lines = FSC unmasked maps; black lines = FSC masked maps; black dashed lines = Corrected FSC phase randomized masked maps).

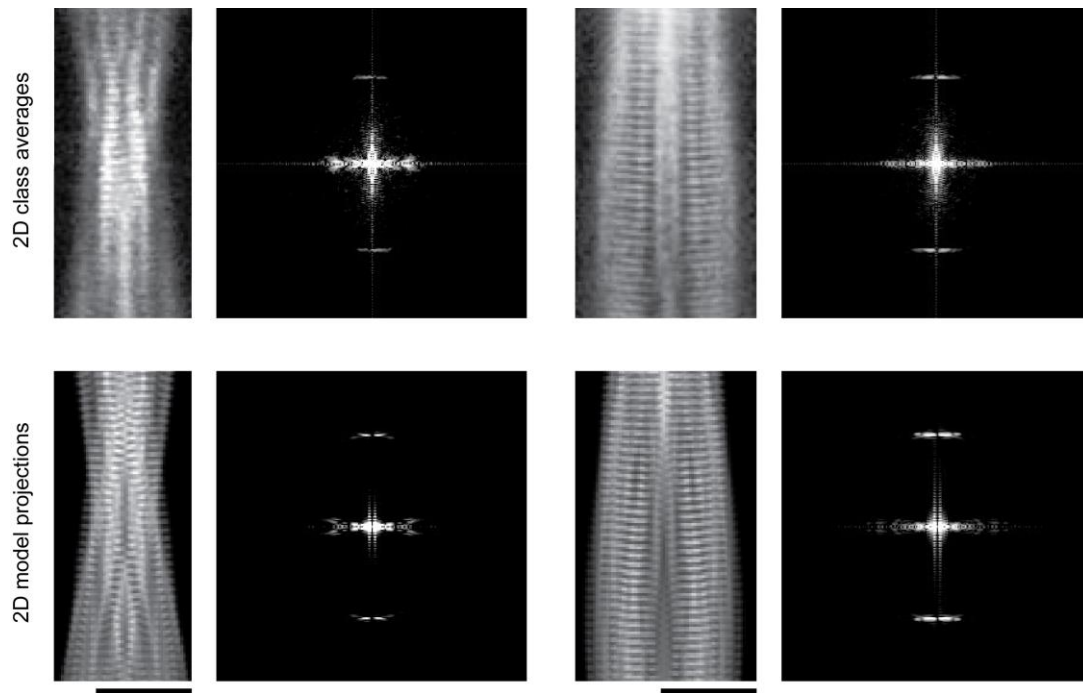

**Supplementary Figure 6.**

**Comparison of the 2D class averages with the model of morphology I.**

Side-by-side comparison of 2D class averages and corresponding power spectra (top row) with 2D projections of the model (bottom row). Scale bar: 5 nm.

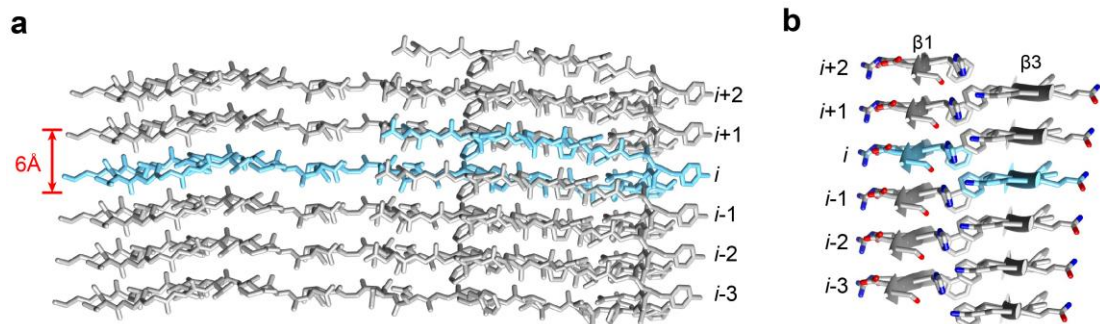

### Supplementary Figure 7.

#### Axial rise of the peptide chain.

(a) Side view of one peptide stack of fibril morphology I. The chain rise per molecule is  $6\text{\AA}$  between the carbonyl carbons of Asp1 and His13. (b) Interactions within the N-terminal arch. Strand  $\beta 1$  of layer  $i$  interacts with strand  $\beta 3$  of layer  $i+1$ .



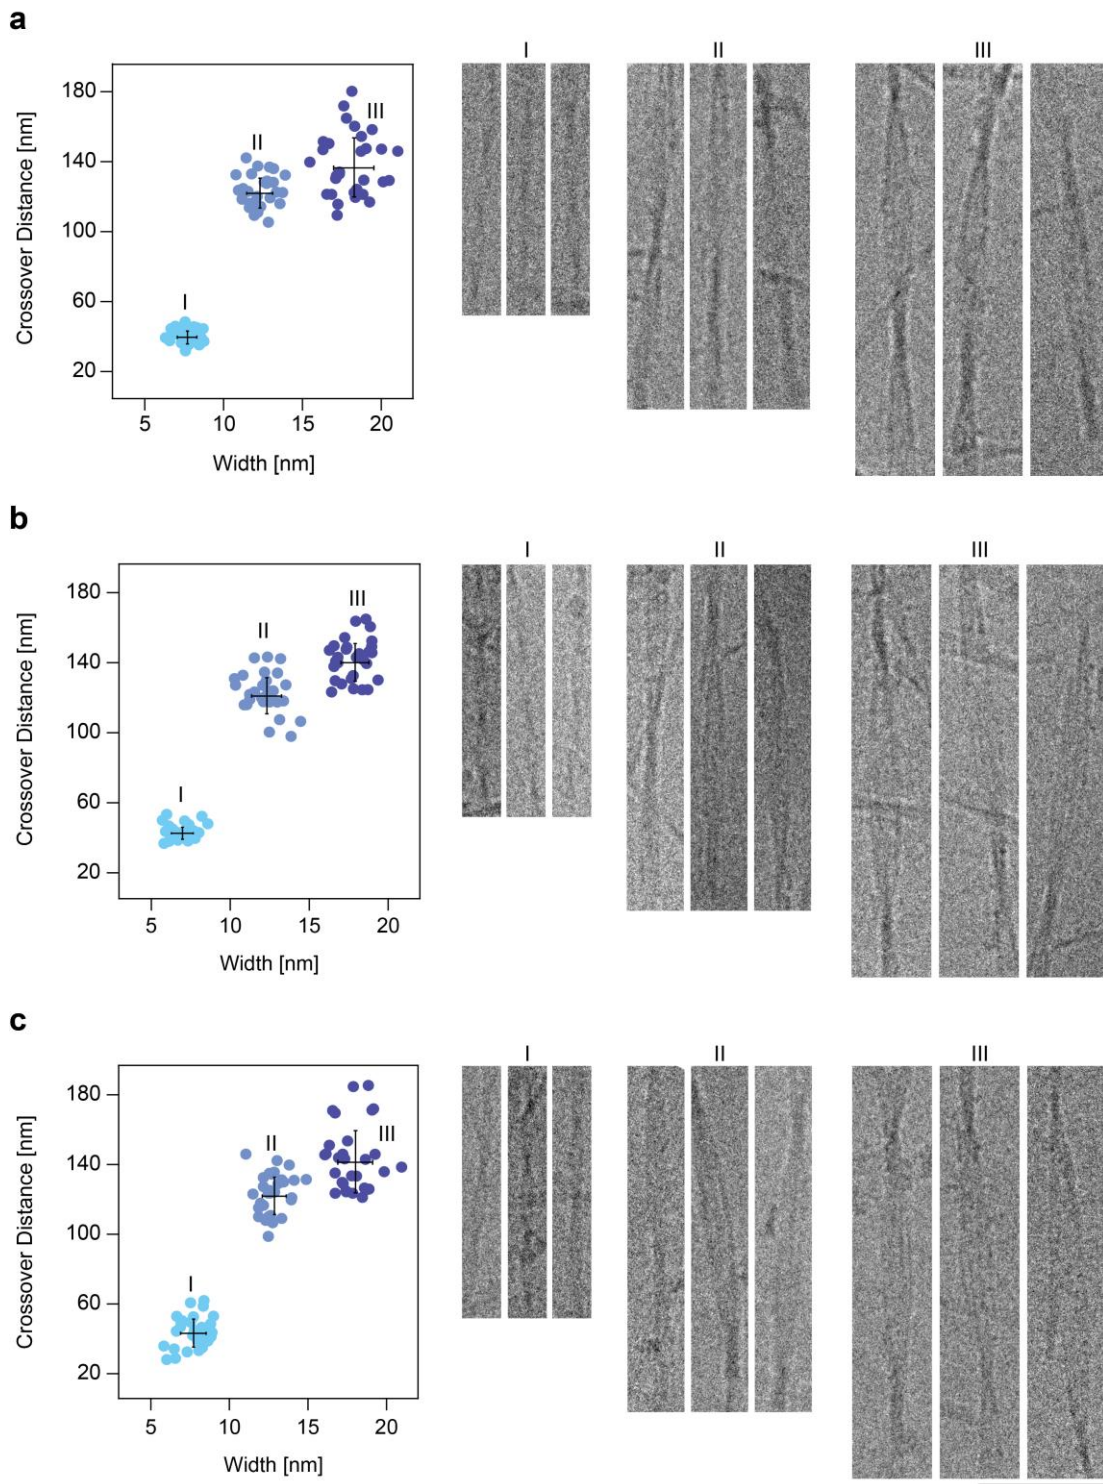

**Supplementary Figure 8.**

**Cryo-EM images of fibril morphologies I-III in cases AD1-AD3.**

(a-c) Presence of morphologies I-III from cases AD1 (a), AD2 (b), and AD3 (c). Left side: quantification of the crossover distances and fibril widths based on 200 kV cryo-EM images (n = 30 each). Black cross:

standard deviations and average values. Right side: 200 kV cryo-EM images of morphologies I-III. Scale bar: 50 nm.

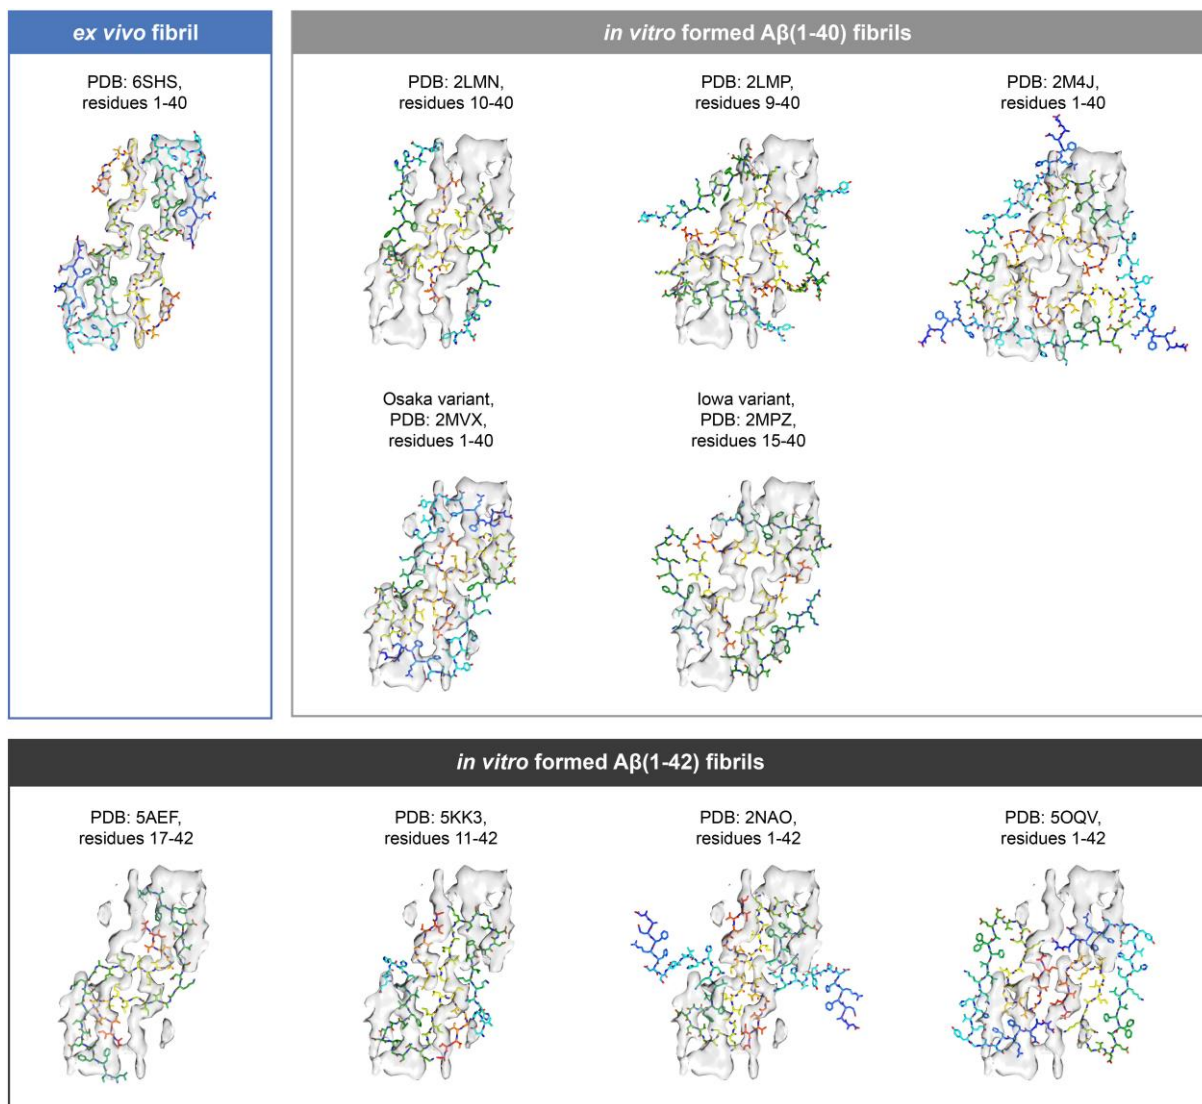

### Supplementary Figure 9.

#### Comparison of our 3D map with structural models of *in vitro* formed A $\beta$ fibrils.

The 3D map of morphology I (grey, in the background) is superimposed with different structural models of *in vitro* formed A $\beta$ (1-40) (light grey box) and A $\beta$ (1-42) fibril (dark grey box)<sup>11,13-19</sup>. Blue box: our structural model. Residue numbers refer to residues in the PDB entry. Two models are based on mutational variants of A $\beta$  (Osaka and Iowa). The Osaka mutation involves the deletion of residue Glu22. Therefore, the PDB entry 2MVX is based on a 39-residue peptide. To avoid confusion in the residue labelling, it is included here within the section A $\beta$ (1-40), as the first and last residues of the peptide correspond to positions 1 and 40 of the wildtype peptide. Side chains in our model are shown in arbitrary conformation.

**Supplementary Table 1.****A $\beta$  peptide variants observed by mass spectrometry.**

Peak numbers 1-10 and experimental masses refer to the peaks shown in Supplementary Figure 2.

Theoretical average masses [M + H]<sup>+</sup>. A possible monosaccharide consistent with peak number 7 is N-Acetyl-D-mannosamine. The theoretical mass given below refers to this modification. A $\beta$ (1-40)oxidized refers to A $\beta$ (1-40), which carries a sulfoxide at position Met35.

| Peak number | Experimental mass / Da | Assignment                      | Theoretical mass / Da |
|-------------|------------------------|---------------------------------|-----------------------|
| 1           | 4,328                  | A $\beta$ (1-40)                | 4,329                 |
| 2           | 4,130                  | A $\beta$ (1-38)                | 4,131                 |
| 3           | 4,213                  | A $\beta$ (2-40)                | 4,214                 |
| 4           | 4,073                  | A $\beta$ (1-37)                | 4,074                 |
| 5           | 4,015                  | A $\beta$ (1-36)                | 4,017                 |
| 6           | 4,228                  | A $\beta$ (1-39)                | 4,230                 |
| 7           | 4,490                  | A $\beta$ (1-40)-monosaccharide | 4,489                 |
| 8           | 3,958                  | A $\beta$ (2-37)                | 3,959                 |
| 9           | 4,115                  | A $\beta$ (2-39)                | 4,115                 |
| 10          | 4,343                  | A $\beta$ (1-40)oxidized        | 4,347                 |

**Supplementary Table 2.****Data collection and reconstruction parameters.**

|                                                  | Morphology 1                           | Morphology 2 | Morphology 3 |
|--------------------------------------------------|----------------------------------------|--------------|--------------|
| Microscope                                       | Titan Krios (Thermo Fisher Scientific) |              |              |
| Camera                                           | K2 Summit (Gatan)                      |              |              |
| Acceleration voltage (kV)                        | 300                                    |              |              |
| Magnification                                    | x 105,000                              |              |              |
| Defocus range ( $\mu\text{m}$ )                  | -1 to -3                               |              |              |
| Dose rate ( $\text{e}^-/\text{\AA}/\text{s}$ )   | 1.7                                    |              |              |
| Number of movie frames                           | 40                                     |              |              |
| Exposure time (s)                                | 24                                     |              |              |
| Total electron dose ( $\text{e}^-/\text{\AA}$ )  | 40.9                                   |              |              |
| Pixel size ( $\text{\AA}$ )                      | 1.35                                   |              |              |
| Box size (pixel)                                 | 150                                    | 180          | 260          |
| Inter box distance ( $\text{\AA}$ )              | 20                                     | 24           | 35           |
| Number of extracted segments                     | 80,811                                 | 56,410       | 23,743       |
| Number of segments after 2D classification       | 48,808                                 | 46,630       | 17,872       |
| Number of segments after 3D classification       | 12,282                                 | 15,345       | 4,960        |
| Resolution, 0.143 FSC criterion ( $\text{\AA}$ ) | 4.4                                    | 5.65         | 7.01         |
| Map sharpening B-Factor ( $\text{\AA}^2$ )       | -145.562                               | -300         | -300         |
| Helical rise ( $\text{\AA}$ )                    | 2.41                                   | 2.46         | 2.45         |
| Helical twist ( $\text{\AA}$ )                   | 181.005                                | 180.339      | 180.294      |

**Supplementary Table 3.****Modelling parameters.**

The provided parameters are based on the fit of morphology I with a six-layer peptide stack, containing 12 peptide molecules.

|                                                 |            |
|-------------------------------------------------|------------|
| Non-hydrogen atoms                              | 3660       |
| Number of chains                                | 12         |
| 3D map resolution estimates compared with model | 4.5        |
| Map CC (around atoms)                           | 0.62       |
| RMSZ bonds (Å)                                  | 0.46       |
| RMSZ angles (°)                                 | 0.60       |
| All-atom clash score                            | 25.13      |
| Ramachandran outliers/favored (%)               | 0.00/78.95 |
| Rotamer outliers/favored (%)                    | 0.00/96.77 |
| C-beta deviations (%)                           | 0.00       |
| Molprobit score                                 | 2.64       |
